# Supplementary material for: DanHong injection targets endothelin receptor type B and angiotensin II receptor type 1 in protection against cardiac hypertrophy
Source: PubMed Central journal article supplement (PMC5732736; doi:10.18632/oncotarget.21900), 2017-10-13
Supplement: oncotarget-08-103393-s001.pdf [file oncotarget-08-103393-s001.pdf]

## DanHong injection targets endothelin receptor type B and angiotensin II receptor type 1 in protection against cardiac hypertrophy

### SUPPLEMENTARY MATERIALS

**Supplementary Table 1: Information for standard compounds in DHI**

| No. | Name                                                   | Retention Time (min) | Compound formula                                | Experimental m/z               | Theoretical m/z | Error Δppm |
|-----|--------------------------------------------------------|----------------------|-------------------------------------------------|--------------------------------|-----------------|------------|
| 1   | tanshinol                                              | 4.51                 | C <sub>9</sub> H <sub>10</sub> O <sub>5</sub>   | 197.0445 [M-H] <sup>-</sup>    | 197.0455        | -5.1       |
| 2   | hydroxy safflor yellow A                               | 4.87                 | C <sub>27</sub> H <sub>31</sub> O <sub>16</sub> | 611.1617[M-H] <sup>-</sup>     | 611.1618        | -0.2       |
| 3   | protocatechuic aldehyde                                | 5.12                 | C <sub>7</sub> H <sub>6</sub> O <sub>3</sub>    | 137.0230 [M-H] <sup>-</sup>    | 137.0244        | -10.2      |
| 4   | caffeic acid                                           | 5.32                 | C <sub>9</sub> H <sub>8</sub> O <sub>4</sub>    | 179.0339 [M-H] <sup>-</sup>    | 179.0350        | -6.1       |
| 5   | (2S, 3S)-1-Phenyl-2,3-butanediol-3-O-D-glucopyranoside | 5.63                 | C <sub>17</sub> H <sub>26</sub> O <sub>9</sub>  | 373.1501 [M+COOH] <sup>-</sup> | 373.1504        | -0.8       |
| 6   | salvianolic acid I                                     | 5.72                 | C <sub>27</sub> H <sub>22</sub> O <sub>12</sub> | 537.1038 [M-H] <sup>-</sup>    | 537.1038        | 0.0        |
| 7   | salvianolic acid D                                     | 5.88                 | C <sub>20</sub> H <sub>18</sub> O <sub>10</sub> | 417.0821 [M-H] <sup>-</sup>    | 417.0827        | -1.4       |
| 8   | salvianolic acid E                                     | 5.98                 | C <sub>36</sub> H <sub>30</sub> O <sub>16</sub> | 717.1459 [M-H] <sup>-</sup>    | 717.1461        | -0.3       |
| 9   | rosmarinic acid                                        | 6.16                 | C <sub>18</sub> H <sub>16</sub> O <sub>8</sub>  | 359.0769 [M-H] <sup>-</sup>    | 359.0772        | -0.8       |
| 10  | salvianolic acid B                                     | 6.25                 | C <sub>36</sub> H <sub>30</sub> O <sub>16</sub> | 717.1455 [M-H] <sup>-</sup>    | 717.1461        | -0.8       |
| 11  | salvianolic acid A                                     | 6.48                 | C <sub>26</sub> H <sub>22</sub> O <sub>10</sub> | 493.1135 [M-H] <sup>-</sup>    | 493.1140        | -1.0       |

**Supplementary Table 2: Hypertrophy related genes from HPO and OMIM. See Supplementary\_ Table\_2**

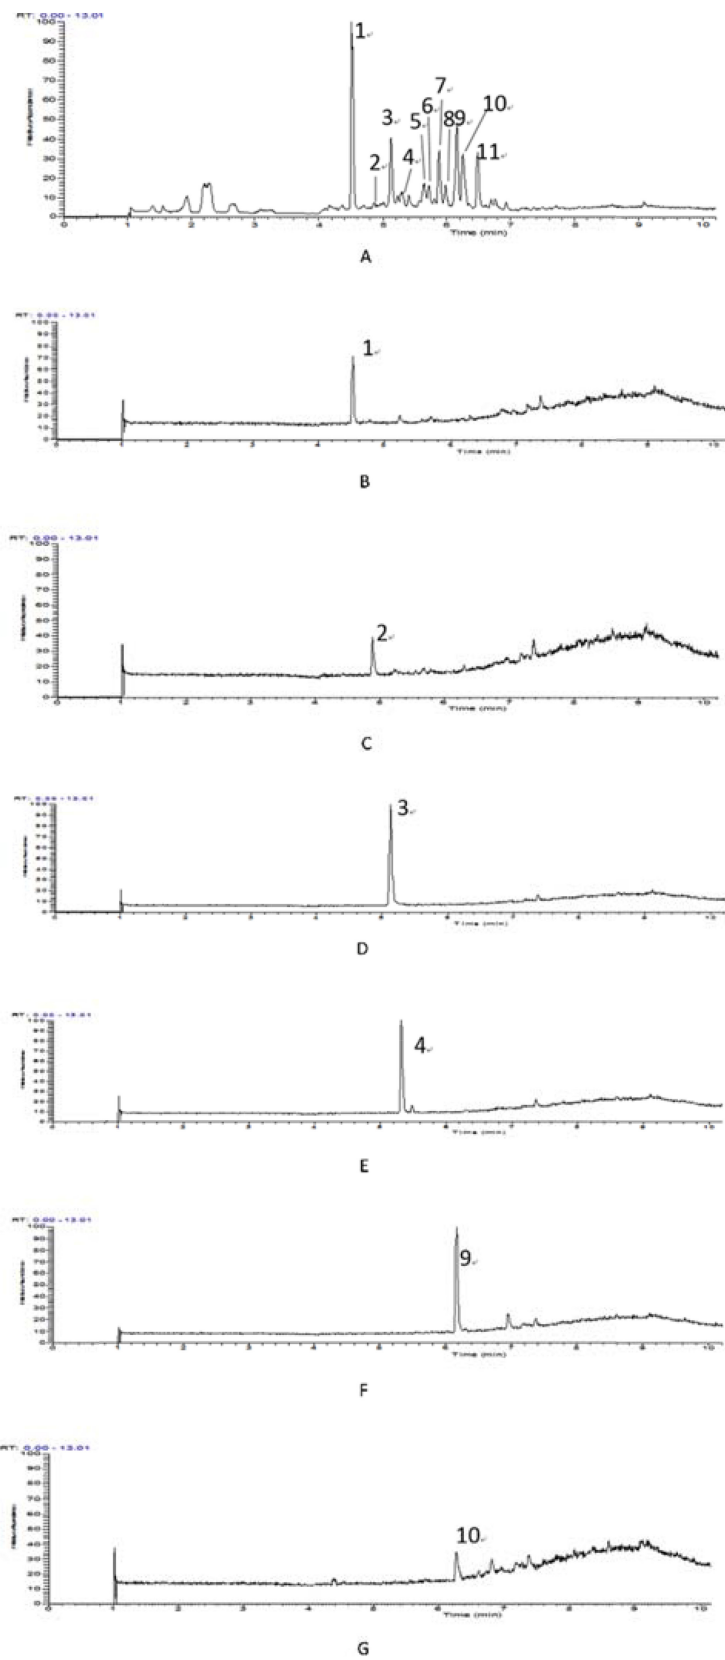

**Supplementary Figure 1: The typical total ion chromatography (TIC) profiles of DanHong injection (DH) and the standards. (A) TIC of DH; (B–G) TIC of the standards. 1 tanshinol; 2 hydroxy safflor yellow A; 3 protocatechuic aldehyde; 4 caffeic acid; 5 (2S, 3S)-1-Phenyl-2,3-butanediol-3-O-D-glucopyranoside; 6 Salvianolic acid I; 7 Salvianolic acid D; 8 Salvianolic acid E; 9 rosmarinic acid (10); 10 salvianolic acid B; 11 salvianolic acid A.**

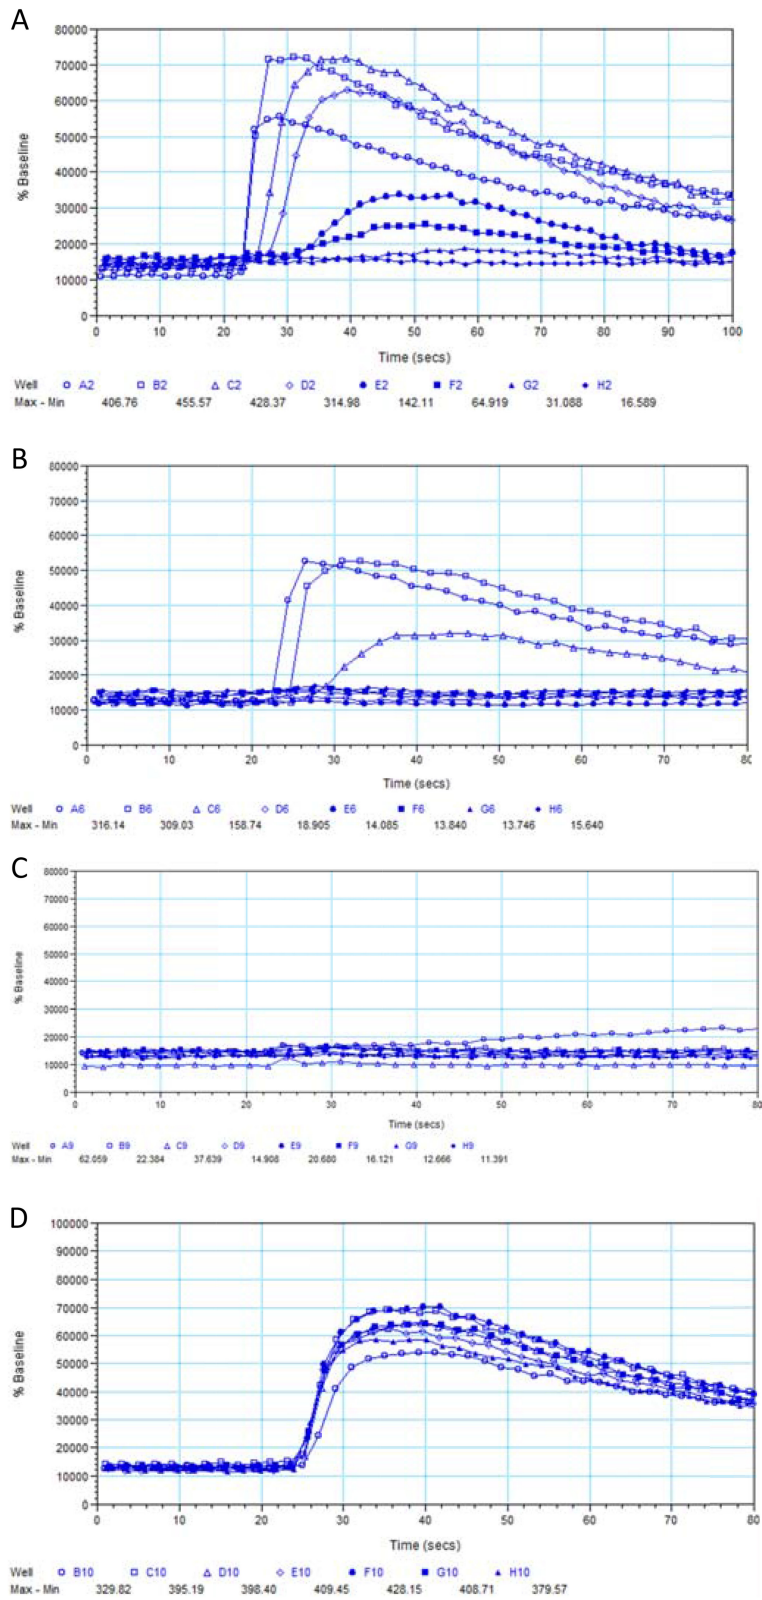

**Supplementary Figure 2: Agonist and antagonist assays of DH on HEK293/Gα15/ETA cell line.** (A) Agonist assay of the HEK293/Gα15/ETA cell line. Dose-response curve for ET-1. (B) Antagonist assay of the HEK293/Gα15/ETA cell line. Dose-response curve for bosentan. (C) Agonist assay of DH on HEK293/Gα15/ETA cell line. DH showed no agonism on ETAR. (D) Antagonist assay of DH on HEK293/Gα15/ETA cell line. DH showed no antagonism on ETAR.

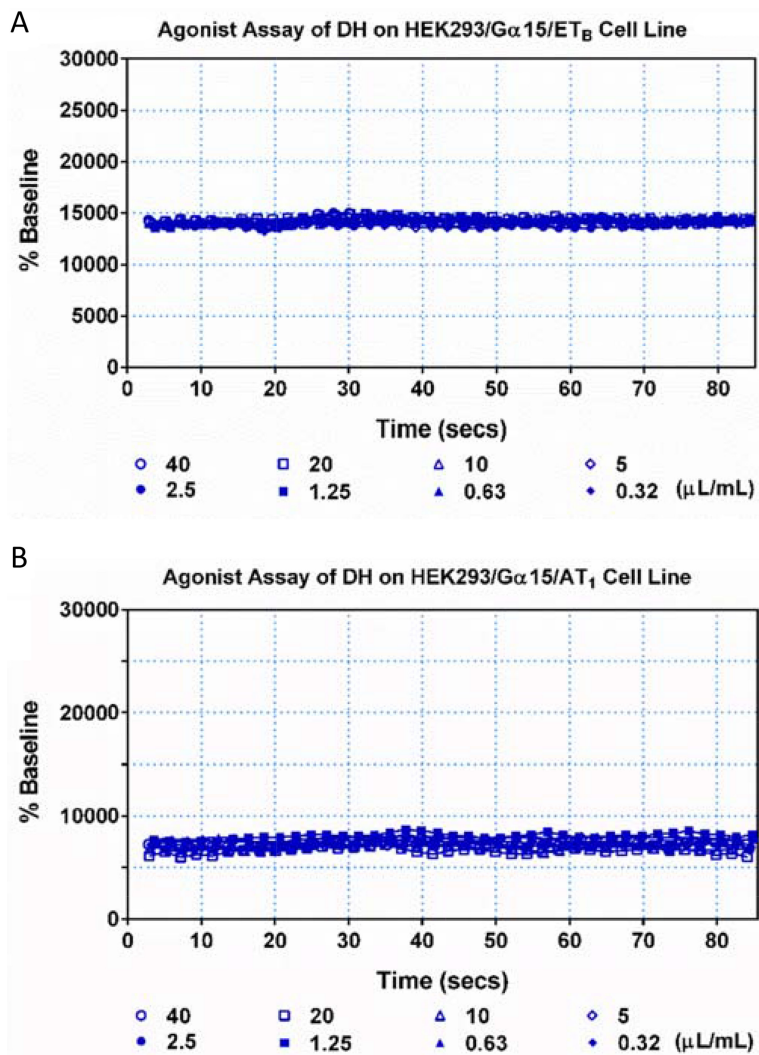

**Supplementary Figure 3: Agonist assay of DH on HEK293/G $\alpha$ 15/ET<sub>B</sub> and HEK293/G $\alpha$ 15/AT<sub>1</sub> cell lines. (A)** Agonist assay of the HEK293/G $\alpha$ 15/ET<sub>B</sub> cell line. DH showed no antagonism on ET<sub>B</sub>R. **(B)** Agonist assay of DH on HEK293/G $\alpha$ 15/AT<sub>1</sub> cell line. DH showed no agonism on AT<sub>1</sub>R.

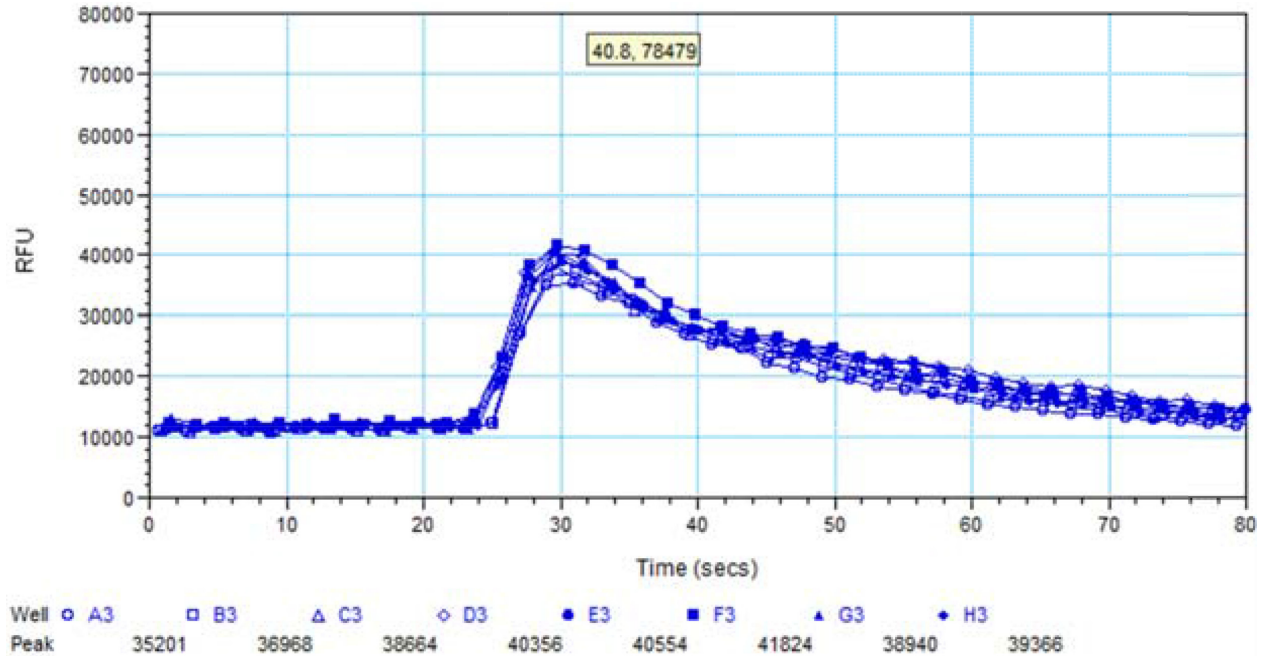

Supplementary Figure 4: Specificity assay of DH on HEK293 cell line.

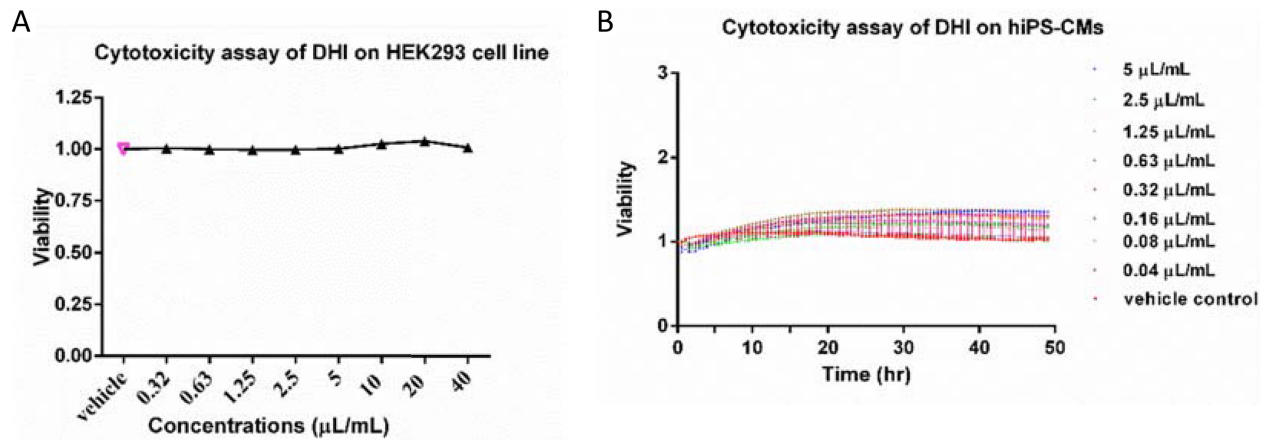

Supplementary Figure 5: Cell viability of hiPS-CMs incubated with DH. (A) ATP depletion of HEK293 cell line treated by DH. (B) Cell index of hiPS-CMs incubated with DH.
